# Supplementary material for: Investigation of the factors favouring solid state [2 + 2] cycloaddition reactions; the [2 + 2] cycloaddition reaction of coumarin-3-carboxylic acid
Source: Royal Society of Chemistry journal article supplement (doi:10.1039/b715941b), 2008-01-01
Supplement: b715941b.pdf [file b715941b.pdf]

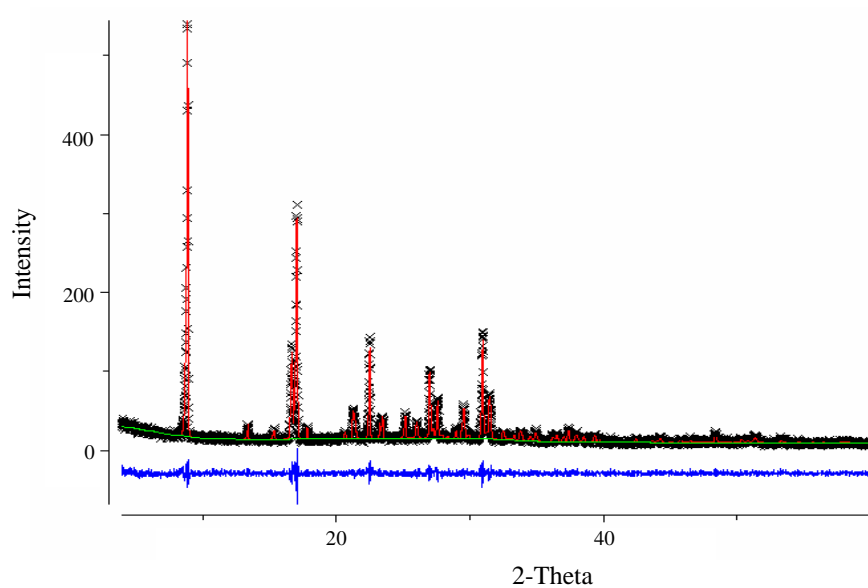

**Fig S1** - Rietveld refinement plot **1b**.  $R_{wp}$  9.00%,  $R_{exp}$  7.91%. (black) observed, (red) calculated, (green) background, (blue) difference between observed and calculated.
